# Supplementary material for: SDC4 Gene Silencing Favors Human Papillary Thyroid Carcinoma Cell Apoptosis and Inhibits Epithelial Mesenchymal Transition via Wnt/β-Catenin Pathway
Source: PubMed Central journal article supplement — Mol Cells. 2018 Aug 31;41(9):853–67. doi: 10.14348/molcells.2018.0103 (PMC6182223; doi:10.14348/molcells.2018.0103), 2018-08-31
Supplement: molce-41-9-853-suppl.pdf [file molce-41-9-853-suppl.pdf]

**Supplementary Table 1** Detailed information about PTC profiles

| Accession | Platform | Organism     | Tissue  | Sample                                                          |
|-----------|----------|--------------|---------|-----------------------------------------------------------------|
| GSE66783  | GPL19850 | Homo sapiens | thyroid | 5 cases of PTC tissues and 5 cases of adjacent normal tissues   |
| GSE3467   | GPL570   | Homo sapiens | thyroid | 9 cases of PTC tissues and 9 cases of adjacent normal tissues   |
| GSE33630  | GPL570   | Homo sapiens | thyroid | 45 cases of PTC tissues and 49 cases of adjacent normal tissues |

Note: PTC, papillary thyroid carcinoma
